# Supplementary material for: Systems Medicine 2.0: Potential Benefits of Combining Electronic Health Care Records With Systems Science Models
Source: PubMed Central journal article supplement (PMC4387294; doi:10.2196/jmir.3082), 2015-03-23
Supplement: jmir_v17i3e64_app1.pdf [file jmir_v17i3e64_app1.pdf]

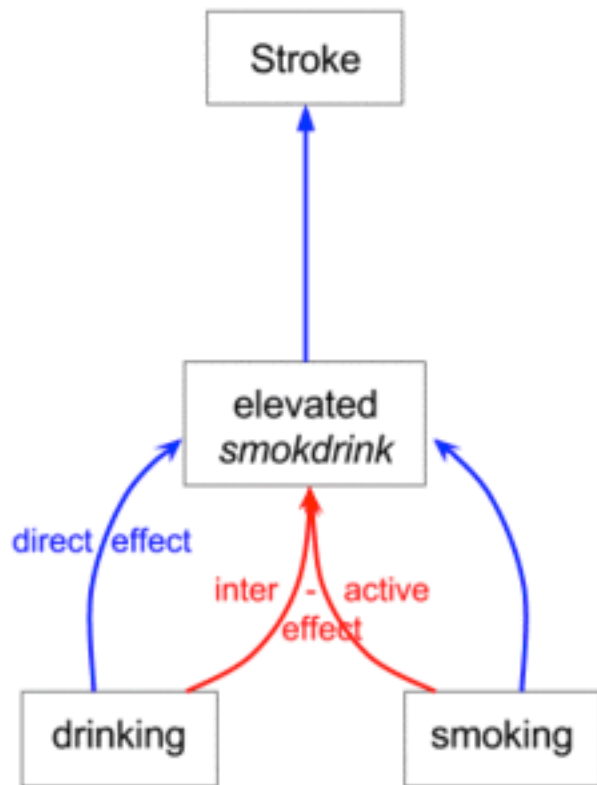

Frame 1 - A simple, nonlinear system

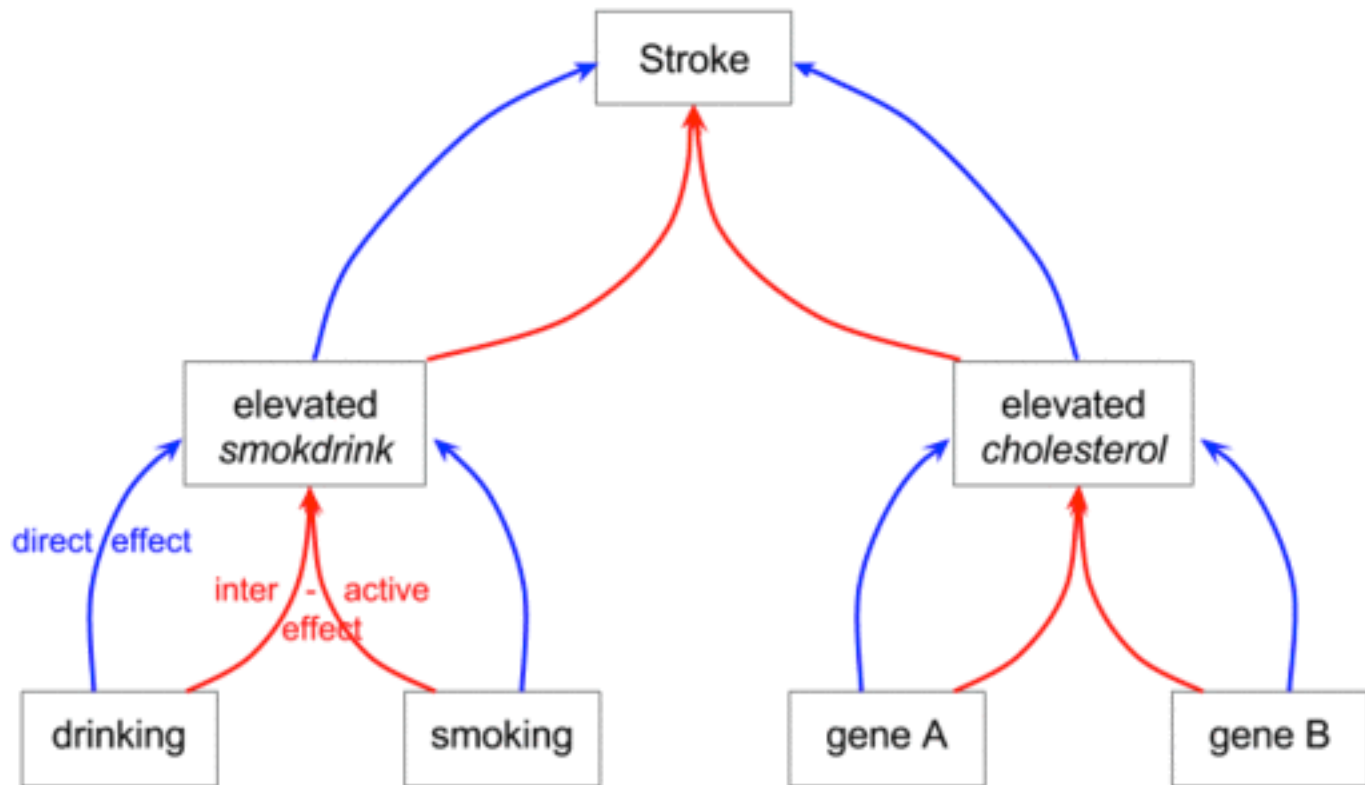

*Frame 2 - increasing complexity*

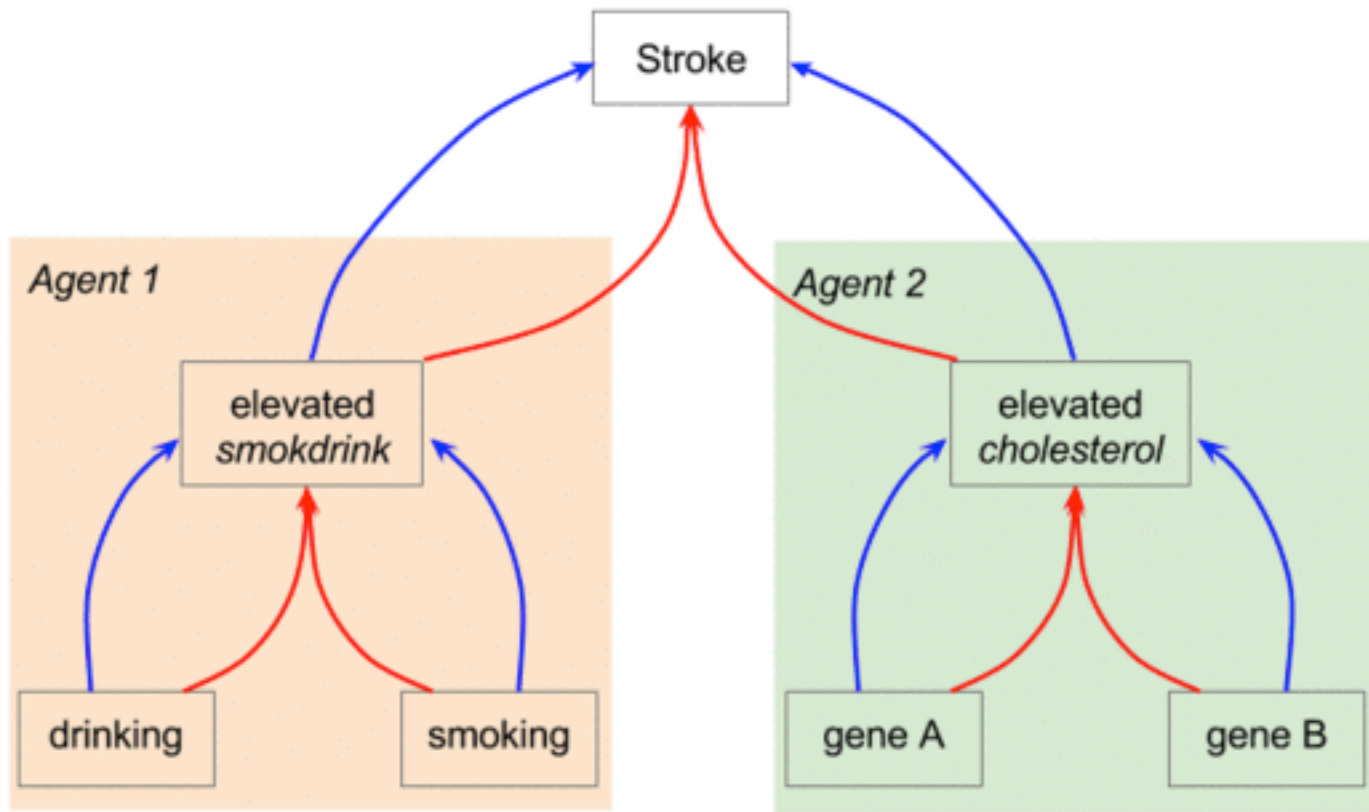

*Frame 3 - a multiagent system*

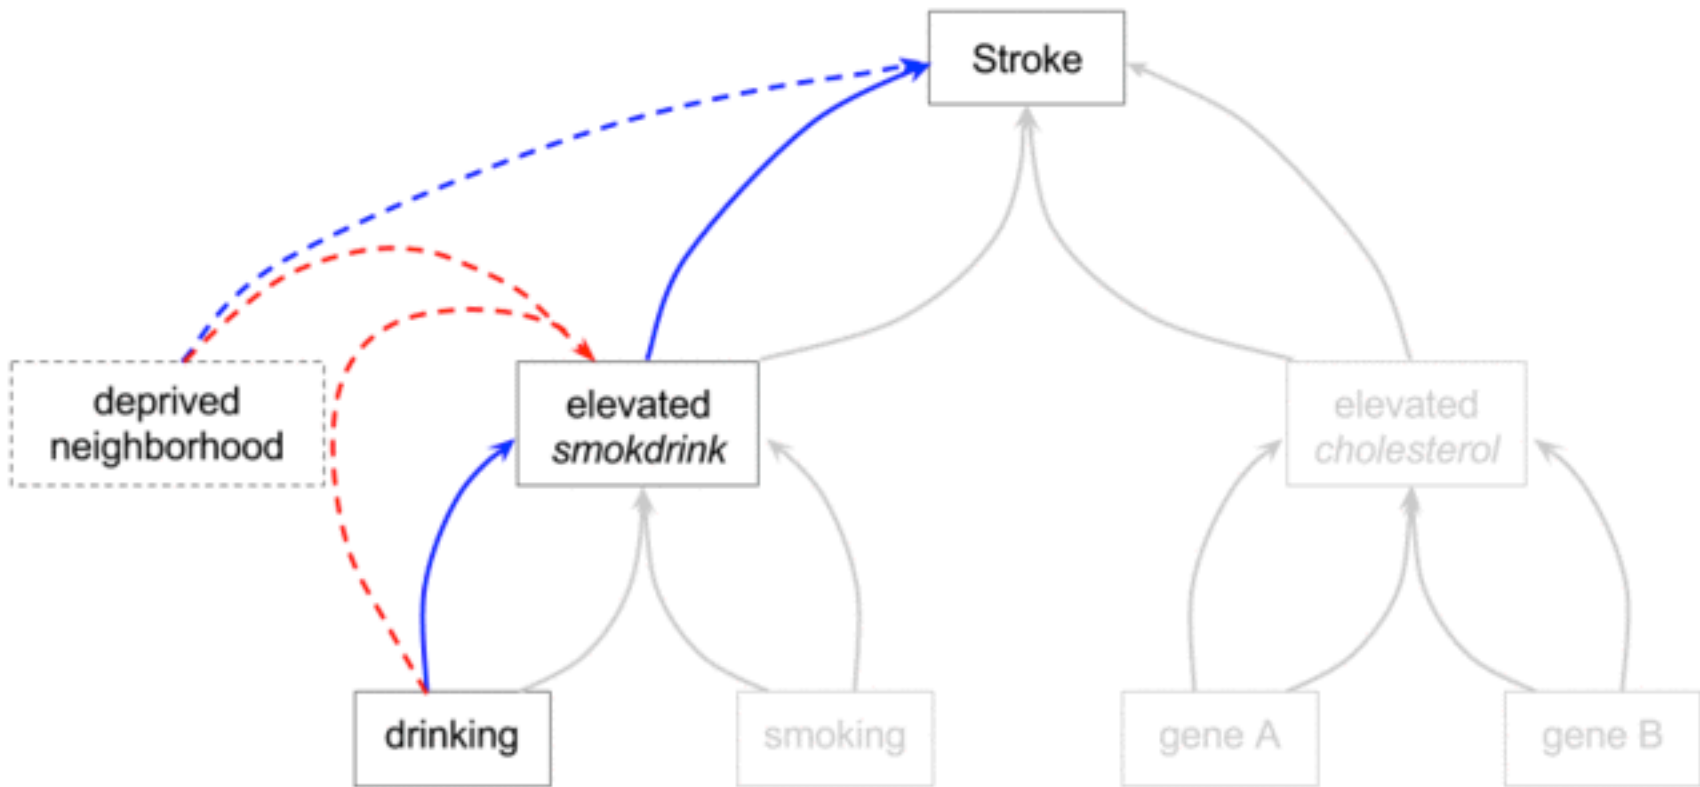

*Frame 4 - a multilevel system*
